# Supplementary material for: A novel mutation causing nephronophthisis in the Lewis polycystic kidney rat localises to a conserved RCC1 domain in Nek8
Source: PubMed Central journal article supplement (PMC3441220; doi:10.1186/1471-2164-13-393), 2012-08-16
Supplement: 1471-2164-13-393-S1.pdf [file 1471-2164-13-393-S1.pdf]

## Additional File 1

**Table S1: Candidate genes**

Genes on chromosome 10 from region 63M to 65.5Mbp, selected as candidate genes for the LPK mutation based on known functional roles.

| SYMBOL     | RGD_ID  | NAME                                                | START    | STOP     | Basis for candidate selection                                                                                                                     |
|------------|---------|-----------------------------------------------------|----------|----------|---------------------------------------------------------------------------------------------------------------------------------------------------|
| RGD1309077 | 1309077 | Similar to putative RNA methyltransferase           | 63600150 | 63600936 | Hypothetical protein associated with RNA binding methyltransferase activity [1].                                                                  |
| Phf12      | 1305731 | PHD finger protein 12                               | 64024504 | 64074603 | Transcriptional repressor of activity. Negative regulation of DNA-dependent transcription [1].                                                    |
| Flot2      | 70993   | Flotillin 2                                         | 64081463 | 64104166 | Colocalized with activated GPI-linked cell adhesion molecules at the plasma membrane [1].                                                         |
| Spag5      | 620152  | Sperm associated antigen 5                          | 64313146 | 64330917 | Associated with microtubules, flagella structures and sperm motility [2].                                                                         |
| Sdf2       | 1307274 | Stromal cell derived factor 2                       | 64378702 | 64389195 | Associated with endoplasmic reticulum (stress induced unfolding). Highly expressed in fast growing, differentiating and meristematic tissues [3]. |
| Supt6h     | 1309290 | Suppressor of Ty 6 homolog ( <i>S. cerevisiae</i> ) | 64388520 | 64425858 | Stimulates transcription elongation [4].                                                                                                          |
| Proca1     | 1561727 | Protein interacting with cyclin A1                  | 64426828 | 64440614 | Protein interacting with cyclin A1-CDK2 complex [5].                                                                                              |
| Nek8       | 1306897 | NIMA (never in mitosis gene a)- related kinase 8    | 64458887 | 64470059 | NPHP9 linked mutation ( <i>jck</i> mouse). Localised to the proximal segment of the cilia inversion compartment. [6, 7].                          |

| SYMBOL | RGD_ID  | NAME                                                | START    | STOP     | Basis for candidate selection                                                                                                                                                                           |
|--------|---------|-----------------------------------------------------|----------|----------|---------------------------------------------------------------------------------------------------------------------------------------------------------------------------------------------------------|
| Traf4  | 1306708 | Tnf receptor associated factor4                     | 64469647 | 64477810 | TNF associated receptor protein associated with signal transduction developmental neural crest. Linked to epithelial homeostasis and cell polarity [8, 9].                                              |
| Sarm1  | 1310078 | Sterile alpha and TIR motif containing 1            | 64584101 | 64607488 | Down regulates NF-kappaB and IRF3 mediated TLR3 and TLR4 signalling. May also directly Inhibit MAPK phosphorylation [10].                                                                               |
| Ift20  | 1309400 | Intraflagellar transport 20 homolog (Chlamydomonas) | 64647046 | 64652539 | Cilia associated protein linked to PKD cystic kidney (floxed knockout mouse). Increases canonical Wnt signaling. Has basal body & Golgi complex interaction with polycystin 2, kinesin2, Kif3a [11-13]. |
| Nik    | 1561602 | Nemo like kinase                                    | 64681465 | 64804964 | Inhibits canonical Wnt pathway regulation, link to usb4 (ubiquitin pathway) [14].                                                                                                                       |
| Ksr1   | 1308105 | Kinase suppressor ras 1                             | 65187915 | 65322237 | A molecular scaffold and positive regulator of the Raf/MEK/ERK phosphorylation cascade [15].                                                                                                            |

## References

1. Rat Genome Database, <http://rgd.mcw.edu>.
2. Fitzgerald CJ, Oko RJ, van der Hoorn FA: **Rat Spag5 associates in somatic cells with endoplasmic reticulum and microtubules but in spermatozoa with outer dense fibers.** *Mol Reprod Dev* 2006, **73**(1):92-100.
3. Schott A, Ravaud S, Keller S, Radzimanowski J, Viotti C, Hillmer S, Sinning I, Strahl S: **Arabidopsis stromal-derived Factor2 (SDF2) is a crucial target of the unfolded protein response in the endoplasmic reticulum.** *J Biol Chem* 2010, **285**(23):18113-18121.
4. Endoh M, Zhu W, Hasegawa J, Watanabe H, Kim DK, Aida M, Inukai N, Narita T, Yamada T, Furuya A *et al*: **Human Spt6 stimulates transcription elongation by RNA polymerase II in vitro.** *Mol Cell Biol* 2004, **24**(8):3324-3336.
5. Diederichs S, Baumer N, Ji P, Metzelder SK, Idos GE, Cauvet T, Wang W, Moller M, Pierschalski S, Gromoll J *et al*: **Identification of interaction partners and substrates of the cyclin A1-CDK2 complex.** *J Biol Chem* 2004, **279**(32):33727-33741.

6. Otto EA, Trapp ML, Schultheiss UT, Helou J, Quarmby LM, Hildebrandt F: **NEK8 mutations affect ciliary and centrosomal localization and may cause nephronophthisis.** *J Am Soc Nephrol* 2008, **19**(3):587-592.
7. Shiba D, Manning DK, Koga H, Beier DR, Yokoyama T: **Inv acts as a molecular anchor for Nphp3 and Nek8 in the proximal segment of primary cilia.** *Cytoskeleton (Hoboken)* 2010, **67**(2):112-119.
8. Kalkan T, Iwasaki Y, Park CY, Thomsen GH: **Tumor necrosis factor-receptor-associated factor-4 is a positive regulator of transforming growth factor-beta signaling that affects neural crest formation.** *Mol Biol Cell* 2009, **20**(14):3436-3450.
9. Kedinger V, Alpy F, Baguet A, Polette M, Stoll I, Chenard MP, Tomasetto C, Rio MC: **Tumor necrosis factor receptor-associated factor 4 is a dynamic tight junction-related shuttle protein involved in epithelium homeostasis.** *PLoS One* 2008, **3**(10):e3518.
10. Peng J, Yuan Q, Lin B, Panneerselvam P, Wang X, Luan XL, Lim SK, Leung BP, Ho B, Ding JL: **SARM inhibits both TRIF- and MyD88-mediated AP-1 activation.** *Eur J Immunol* 2010, **40**(6):1738-1747.
11. Follit JA, San Agustin JT, Xu F, Jonassen JA, Samtani R, Lo CW, Pazour GJ: **The Golgin GMAP210/TRIP11 anchors IFT20 to the Golgi complex.** *PLoS Genet* 2008, **4**(12):e1000315.
12. Jurczyk A, Gromley A, Redick S, San Agustin J, Witman G, Pazour GJ, Peters DJ, Doxsey S: **Pericentrin forms a complex with intraflagellar transport proteins and polycystin-2 and is required for primary cilia assembly.** *J Cell Biol* 2004, **166**(5):637-643.
13. Baker SA, Freeman K, Luby-Phelps K, Pazour GJ, Besharse JC: **IFT20 links kinesin II with a mammalian intraflagellar transport complex that is conserved in motile flagella and sensory cilia.** *J Biol Chem* 2003, **278**(36):34211-34218.
14. Thorpe CJ, Moon RT: **nemo-like kinase is an essential co-activator of Wnt signaling during early zebrafish development.** *Development* 2004, **131**(12):2899-2909.
15. Razidlo GL, Kortum RL, Haferbier JL, Lewis RE: **Phosphorylation regulates KSR1 stability, ERK activation, and cell proliferation.** *J Biol Chem* 2004, **279**(46):47808-47814.
